# Supplementary material for: GEPSI: A Gene Expression Profile Similarity-Based Identification Method of Bioactive Components in Traditional Chinese Medicine Formula
Source: Evid Based Complement Alternat Med. 2018 Mar 6;2018:6935350. doi: 10.1155/2018/6935350 (PMC5859853; doi:10.1155/2018/6935350)
Supplement: Supplementary Materials — 1: it includes 656 components of SWT. These components were used for molecular docking. Supplementary Materials 2: 442 upregulated genes and 189 downregulated genes. Supplementary Materials 3: the LibDock score of the ligand. [file 6935350.f1.xlsx]

## Sheet: shu-di-huang
Compound Name	CAS ID	Pubchem ID	SMILES
Rehmannioside B	81720-06-1	6325882	C1=COC(C2C1C(C3C2(O3)CO)OC4C(C(C(C(O4)CO)O)O)O)OC5C(C(C(C(O5)CO)O)O)O
Rehmannioside C	81720-07-2	6325883	CC1(CC(C2C1C(OC=C2)OC3C(C(C(C(O3)CO)O)O)O)OC4C(C(C(C(O4)CO)O)O)O)O
succinic acid	110-15-6	Not Available	C(CC(=O)O)C(=O)O
5-Hydroxymethyl-2-furancarboxylic acid	6338-41-6	80642	C1=C(OC(=C1)C(=O)O)CO
5-HMF	67-47-0	Not Available	C1=C(OC(=C1)C=O)CO
jiofuran	10142531	5318702	C1=C2C(C(C(C2=CO1)O)O)CCO
Phenylalanine	673-31-4	Not Available	C1=CC=C(C=C1)CC(C(=O)O)N
uridine	58-96-8	Not Available	C1=CN(C(=O)NC1=O)C2C(C(C(O2)CO)O)O
uracil	66-22-8	Not Available	C1=CNC(=O)NC1=O
Melittoside	Not Available	11968737	C1=COC(C2C1(C(C=C2CO)O)OC3C(C(C(C(O3)CO)O)O)O)OC4C(C(C(C(O4)CO)O)O)O
Rehmannioside D	81720-08-3	86287411	C1=COC(C2C1(C(C=C2CO)O)OC3C(C(C(C(O3)CO)O)O)OC4C(C(C(C(O4)CO)O)O)O)OC5C(C(C(C(O5)CO)O)O)O
aucubin	479-98-1	Not Available	C1=COC(C2C1C(C=C2CO)O)OC3C(C(C(C(O3)CO)O)O)O
catalpol	2415-24-9	Not Available	C1=COC(C2C1C(C3C2(O3)CO)O)OC4C(C(C(C(O4)CO)O)O)O
Rehmannioside A	81720-05-0	86287413	C1=COC(C2C1C(C3C2(O3)CO)O)OC4C(C(C(C(O4)COC5C(C(C(C(O5)CO)O)O)O)O)O)O
Danmelittoside	20633-72-1	Not Available	C1C=C(C2C1C=COC2OC3C(C(C(C(O3)(CO)O)(O)O)O)O)CO
Rehmaglutin C	Not Available	5320905	C1C2C(C=C(C2(OC1=O)CO)CO)O
Glutinoside	Not Available	24884124	C1C2CC(C3C1C(C(C3(OO2)O)Cl)O)OC4C(C(C(C(O4)CO)O)O)O
5-oxoproline	98-79-3	7405	C1CC(=O)NC1C(=O)O
5-oxoproline	98-79-3	Not Available	C1CC(=O)NC1C(=O)O
Dihydrocatalpol	Not Available	5705531	C1COC(C2C1C(C3C2(O3)CO)O)OC4C(C(C(C(O4)CO)O)O)O
Rehmaglutin A	103744-82-7	5320903	C1COC2C3C1C(C(C3(CO2)O)O)O
aegineticacid	53537-92-1	Not Available	CC(=CC(=O)O)C=CC1(C(CCCC1(C)O)(C)C)O
Ajugoside	52916-96-8	Not Available	CC(=O)OC1(CCC2C1C(OC=C2)OC3C(C(C(C(O3)(CO)O)O)O)O)C
jioglutolide	Not Available	5318708	CC1(CC(C2C1COC(=O)C2)O)O
Ajugol	52949-83-4	Not Available	CC1(CCC2C1C(OC=C2)OC3C(C(C(C(O3)(CO)O)O)O)O)O
Rehmapicroside	Not Available	5320914	CC1=C(C(CCC1OC2C(C(C(C(O2)CO)O)O)O)(C)C)C(=O)O
isoacteoside	61303-13-7	Not Available	CC1C(C(C(C(O1)OC2C(C(OC(C2O)OCCC3=CC(=C(C=C3)O)O)COC(=O)C=CC4=CC(=C(C=C4)O)O)O)O)O)O
Cistanoside F	Not Available	44429870	CC1C(C(C(C(O1)OC2C(C(OC(C2OC(=O)C=CC3=CC(=C(C=C3)O)O)CO)O)O)O)O)O		MOL003696
Acteoside	61276-17-3	Not Available	CC1C(C(C(C(O1)OC2C(C(OC(C2OC(=O)C=CC3=CC(=C(C=C3)O)O)CO)OCCC4=CC(=C(C=C4)O)O)O)O)O)O
Jionoside D	Not Available	9895632	CC1C(C(C(C(O1)OC2C(C(OC(C2OC(=O)C=CC3=CC(=C(C=C3)O)O)CO)OCCC4=CC(=C(C=C4)OC)O)O)O)O)O
Echinacoside	82854-37-3	Not Available	CC1C(C(C(C(O1)OC2C(C(OC(C2OC(=O)C=CC3=CC(=C(C=C3)O)O)COC4C(C(C(C(O4)CO)O)O)O)OCCC5=CC(=C(C=C5)O)O)O)O)O)O
Echinacoside	82854-37-3	5281771	CC1C(C(C(C(O1)OC2C(C(OC(C2OC(=O)C=CC3=CC(=C(C=C3)O)O)COC4C(C(C(C(O4)CO)O)O)O)OCCC5=CC(=C(C=C5)O)O)O)O)O)O
Leucosceptoside A	Not Available	10394343	CC1C(C(C(C(O1)OC2C(C(OC(C2OC(=O)C=CC3=CC(=C(C=C3)O)OC)CO)OCCC4=CC(=C(C=C4)O)O)O)O)O)O
Martynoside	Not Available	44429856	CC1C(C(C(C(O1)OC2C(C(OC(C2OC(=O)C=CC3=CC(=C(C=C3)O)OC)CO)OCCC4=CC(=C(C=C4)OC)O)O)O)O)O
Jionoside A1	Not Available	6325450	CC1C(C(C(C(O1)OC2C(C(OC(C2OC(=O)C=CC3=CC(=C(C=C3)O)OC)COC4C(C(C(C(O4)CO)O)O)O)OCCC5=CC(=C(C=C5)O)O)O)O)O)O
Jionoside B1	Not Available	5281782	CC1C(C(C(C(O1)OC2C(C(OC(C2OC(=O)C=CC3=CC(=C(C=C3)O)OC)COC4C(C(C(C(O4)CO)O)O)O)OCCC5=CC(=C(C=C5)OC)O)O)O)O)O		MOL003715
Jioglutoside A	Not Available	11968647	CC1C(C(C(C(O1)OC2C3C(C=CO2)C(C4C3(O4)CO)O)O)O)O
Jioglutoside B	Not Available	11968648	CC1C(C(C(C(O1)OCC2C(C(C(C(O2)OC3C4C(CCC4=C)C(=CO3)C(=O)OC)O)O)O)O)O)O
forsythoside A	79916-77-1	Not Available	CC1C(C(C(C(O1)OCC2C(C(C(C(O2)OCCC3=CC(=C(C=C3)O)O)O)O)OC(=O)C=CC4=CC(=C(C=C4)O)O)O)O)O
8-epiloganic acid	82509-41-9	Not Available	CC1C(CC2C1C(OC=C2C(=O)O)OC3C(C(C(C(O3)CO)O)O)O)O
linoleic acid	60-33-3	Not Available	CCCCCC=CCC=CCCCCCCCC(=O)O
palmitoleic acid	373-49-9	Not Available	CCCCCCC=CCCCCCCCC(=O)O
myristic acid	544-63-8	Not Available	CCCCCCCCCCCCCC(=O)O
pentadecanoic acid	1002-84-2	Not Available	CCCCCCCCCCCCCCC(=O)O
palmitic acid	1957-10-3	Not Available	CCCCCCCCCCCCCCCC(=O)O
margaric acid	506-12-7	Not Available	CCCCCCCCCCCCCCCCC(=O)O
stearic acid	57-11-4	Not Available	CCCCCCCCCCCCCCCCCC(=O)O
nonadecanOic acid	646-30-0	Not Available	CCCCCCCCCCCCCCCCCCC(=O)O
arachidic acid	506-30-9	Not Available	CCCCCCCCCCCCCCCCCCCC(=O)O
heneicosanoic acid	2363-71-5	Not Available	CCCCCCCCCCCCCCCCCCCCC(=O)O
behenic acid	112-85-6	Not Available	CCCCCCCCCCCCCCCCCCCCCC(=O)O
Geniposide	24512-62-7	Not Available	COC(=O)C1=COC(C2C1CC=C2CO)OC3C(C(C(C(O3)CO)O)O)O
jioglutin A	Not Available	5318703	COC1CC2C3C(O1)OCC3(C(C2O)Cl)O
jioglutin C	Not Available	5318705	COC1CC2C3C(O1)OCC3(C(C2O)O)O
DL-Methionine	59-51-8	Not Available	CSCCC(C(=O)O)N
Cistanoside A	93236-42-1	Not Available	O=C(/C([H])=C([H])/C1=C([H])C([H])=C(O[H])C(O[H])=C1[H])OC2([H])C(C([H])([H])OC(OC(C([H])([H])O[H])([H])C3([H])O[H])([H])C(O[H])([H])C3([H])OC4([H])C(O[H])([H])C(O[H])([H])C(O[H])([H])C(C([H])([H])[H])([H])O4)([H])OC(OC([H])([H])C([H])([H])C5=C([H])C([H])=C(O[H])C(OC([H])([H])[H])=C5[H])([H])C(O[H])([H])C2([H])O[H]
Rehmaglutin D	103744-84-9	Not Available	OC1C2CCOC(OC3)C2C3(O)C1Cl
Rehmaglutin B	103744-83-8	Not Available	OC1OC2C3C(C(O)C(Cl)C3(O)CO2)C1
3-hydroxy-2,6,6-trimethyl-1cyclohexene-1-carboxylic acid	Not Available	Not Available	Not Available
decaffeoyl-verbascoside	Not Available	Not Available	Not Available
5-(α-D-glucopyranosy-(1-6)-α-D-glucopyranosyloxymethyl)-2-furancarboxaldehyde	Not Available	Not Available	Not Available
5-(α-D-glucopyranosyloxymethyl)-furancarboxaldehyde	Not Available	Not Available	Not Available
jioglutin B	Not Available	Not Available	Not Available
rehmapicrogenin	Not Available	Not Available	Not Available
trihydroxy-β-lonone	Not Available	Not Available	Not Available
dihydroxy-p-lonone	Not Available	Not Available	Not Available
gross polysaccharide of Radix Rehmanniae	Not Available	Not Available	Not Available
A-GALACTOSYLCERAMIDE	Not Available	Not Available	Not Available
Jionoside A2	Not Available	Not Available	Not Available
Jionoside B2	Not Available	Not Available	Not Available
Leucosceptoside	Not Available	Not Available	Not Available
Martynoside isomer	Not Available	Not Available	Not Available
sec-Hydroxyaeginetic acid	Not Available	Not Available	Not Available
Rehmapicrogenin	Not Available	Not Available	Not Available
D-mannitol	133-43-7	6251	C(C(C(C(C(CO)O)O)O)O)O
Lauric acid	8045-27-0	3893	CCCCCCCCCCCC(=O)O
Daucosterol	474-58-8	5742590	CCC(CCC(C)C1CCC2C1(CCC3C2CC=C4C3(CCC(C4)OC5C(C(C(C(O5)CO)O)O)O)C)C)C(C)C
sitosterol(3R,8S,9S,10R,13R,14S,17R)-17-[(2R,5R)-5-ethyl-6-methylheptan-2-yl]-10,13-dimethyl-2,3,4,7,8,9,11,12,14,15,16,17-dodecahydro-1H-cyclopenta[a]phenanthren-3-ol)	83-46-5	12303645	CCC(CCC(C)C1CCC2C1(CCC3C2CC=C4C3(CCC(C4)O)C)C)C(C)C
Ferulic acid	537-98-4	445858	COC1=C(C=CC(=C1)C=CC(=O)O)O
Cis-Caffeic acid/Caffeicacid	331-39-5	1549111	C1=CC(=C(C=C1C=CC(=O)O)O)O
Stigmasterol	83-48-7	5280794	CCC(C=CC(C)C1CCC2C1(CCC3C2CC=C4C3(CCC(C4)O)C)C)C(C)C
sucrose	25702-74-3	5988	C(C1C(C(C(C(O1)OC2(C(C(C(O2)CO)O)O)CO)O)O)O)O
leonuride	50906-66-6	46227138	CC1(CC(C2C1C(OC=C2)OC3C(C(C(C(O3)CO)O)O)O)O)O
Methyl (2E,4E)-hexadeca-2,4-dienoate	29961-54-4	6443015	CCCCCCCCCCCC=CC=CC(=O)OC
Dihydro-beta-ionone	17283-81-7	519382	CC1=C(C(CCC1)(C)C)CCC(=O)C
Forsythiaside	79916-77-1	5281773	CC1C(C(C(C(O1)OCC2C(C(C(C(O2)OCCC3=CC(=C(C=C3)O)O)O)O)OC(=O)C=CC4=CC(=C(C=C4)O)O)O)O)O
2-(4-hydroxyphenyl)ethyl hexacosanoate	Not Available	481679	CCCCCCCCCCCCCCCCCCCCCCCCCC(=O)OCCC1=CC=C(C=C1)O
methyl 9,10-methylene-hexadecanoate	Not Available	12159685	CCCCCCC1CC1CCCCCCCC(=O)OC
(2S,3R,4R,5S,6R)-2-[[(1S,4aS,5R,7aR)-4a,5-dihydroxy-7-(hydroxymethyl)-5,7a-dihydro-1H-cyclopenta[c]pyran-1-yl]oxy]-6-(hydroxymethyl)oxane-3,4,5-triol	Not Available	21550273	C1=COC(C2C1(C(C=C2CO)O)O)OC3C(C(C(C(O3)CO)O)O)O
Geniposide	24512-63-8	107848	COC(=O)C1=COC(C2C1CC=C2CO)OC3C(C(C(C(O3)CO)O)O)O
methyl (1S,4aS,7aS)-7-methylene-1-[(2S,3R,4S,5S,6R)-3,4,5-trihydroxy-6-[[(2R,3R,4R,5S,6R)-3,4,5-trihydroxy-6-methyl-tetrahydropyran-2-yl]oxymethyl]tetrahydropyran-2-yl]oxy-4a,5,6,7a-tetrahydro-1H-cyclopenta[d]pyran-4-carboxylate	Not Available	21550422	CC1C(C(C(C(O1)OCC2C(C(C(C(O2)OC3C4C(CCC4=C)C(=CO3)C(=O)OC)O)O)O)O)O)O
METHYL PALMITOLEATE	1120-25-8	643801	CCCCCCC=CCCCCCCCC(=O)OC
Purpureaside C	82854-37-3	11953944	CC1C(C(C(C(O1)OC2C(C(OC(C2OC(=O)C=CC3=CC(=C(C=C3)O)O)COC4C(C(C(C(O4)CO)O)O)O)OCCC5=CC(=C(C=C5)O)O)O)O)O)O
Rehmaglutin B	103744-83-8	5320904	C1C2C3C(OCC3(C(C2O)Cl)O)OC1O
(Rehmaionoside A）/(2S,3R,4S,5S,6R)-2-[(1R,2R)-2-hydroxy-2-[(E,3S)-3-hydroxybut-1-enyl]-1,3,3-trimethylcyclohexoxy]-6-(hydroxymethyl)tetrahydropyran-3,4,5-triol	Not Available	10023290	CC(C=CC1(C(CCCC1(C)OC2C(C(C(C(O2)CO)O)O)O)(C)C)O)O
(Rehmaionoside B)/(2S,3R,4S,5S,6R)-2-[(1R,2R)-2-hydroxy-2-[(E,3R)-3-hydroxybut-1-enyl]-1,3,3-trimethylcyclohexoxy]-6-(hydroxymethyl)tetrahydropyran-3,4,5-triol	Not Available	10430488	CC(C=CC1(C(CCCC1(C)OC2C(C(C(C(O2)CO)O)O)O)(C)C)O)O
Rehmaionoside C/(E)-4-[(1R,6R)-1-hydroxy-2,2,6-trimethyl-6-[(2S,3R,4S,5S,6R)-3,4,5-trihydroxy-6-(hydroxymethyl)oxan-2-yl]oxycyclohexyl]but-3-en-2-one	Not Available	11740990	CC(=O)C=CC1(C(CCCC1(C)OC2C(C(C(C(O2)CO)O)O)O)(C)C)O
Rehmannioside A/(3R)-2,6,6-trimethyl-3-[(2R,3R,4S,5S,6R)-3,4,5-trihydroxy-6-(hydroxymethyl)oxan-2-yl]oxycyclohexene-1-carboxylic acid	Not Available	6325881	CC1=C(C(CCC1OC2C(C(C(C(O2)CO)O)O)O)(C)C)C(=O)O

## Sheet: dang-gui
Compound Name	CAS ID	Pubchem ID	SMILES
Phenylalanine	673-31-4	Not Available	C1=CC=C(C=C1)CCCOC(=O)N
Linoleic acid	60-33-3	Not Available	CCCCCC=CCC=CCCCCCCCC(=O)O
Stearic acid	57-11-4	Not Available	CCCCCCCCCCCCCCCCCC(=O)O
Galactose	381716-33-2	Not Available	C(C1C(C(C(C(O1)O)O)O)O)O
Pentadecanoic acid	1002-84-2	Not Available	CCCCCCCCCCCCCCC(=O)O
Sitosterol	5779-62-4	Not Available	CCC(CCC(C)C1CCC2C1(CCC3C2CC=C4C3(CCC(C4)O)C)C)C(C)C
Stigma- sterol-D-glucoside	Not Available	70699355	CCC(C=CC(C)C1CCC2C1(CCC3C2CC=C4C3(CCC(C4)OC5C(C(C(C(O5)CO)O)O)O)C)C)C(C)C
Vitamin E	59-02-9	Not Available	CC1=C(C(=C2CCC(OC2=C1C)(C)CCCC(C)CCCC(C)CCCC(C)C)C)O
beta-pinene	127-91-3	Not Available	CC1(C2CCC(=C)C1C2)C
alpha-pinene	80-56-8	6654	CC1=CCC2CC1C2(C)C
p-Cymene	99-87-6	Not Available	CC1=CC=C(C=C1)C(C)C
β-Phellandrene	99-83-2	Not Available	CC(C)C1CCC(=C)C=C1
Myrcene	123-35-3	Not Available	CC(=CCCC(=C)C=C)C
Acetophenone	98-86-2	Not Available	CC(=O)C1=CC=CC=C1
Chamigrene	16982-00-6	Not Available	CC1=CCC2(CC1)C(=C)CCCC2(C)C
n-Butyl-phthalide	Not Available	3026	CCCCOC(=O)C1=CC=CC=C1C(=O)OCCCC
bergaptene	484-20-8	Not Available	COC1=C2C=CC(=O)OC2=CC3=C1C=CO3
4-Methylbenzyl alcohol	589-18-4	Not Available	CC1=CC=C(C=C1)CO
Phthalic acid	88-99-3	Not Available	C1=CC=C(C(=C1)C(=O)O)C(=O)O
Glabralactone	37719-98-5	Not Available	CC(=CC(=O)C1=C(C=C(C2=C1OC(=O)C=C2)OC)OC)C
guaiacol	90-05-1	460	COC1=CC=CC=C1O
2',4'-Dihydroxyacetophenone	89-84-9	Not Available	CC(=O)C1=C(C=C(C=C1)O)O
β-ocimene	13877-91-3	Not Available	CC(=CCC=C(C)C=C)C
Styrene	100-42-5	Not Available	C=CC1=CC=CC=C1
(E)-β-farnesene	18794-84-8	Not Available	CC(=CCC/C(=C/CCC(=C)C=C)/C)C
γ-elemene	Not Available	6432312	CC(=C1CCC(C(C1)C(=C)C)(C)C=C)C
α-copaene	Not Available	25245021	CC1=CCC2C3C1C2(CCC3C(C)C)C
cyclohexane	110-82-7	Not Available	C1CCCCC1
Adenine	73-24-5	Not Available	C1=NC2=C(N1)C(=NC=N2)N
vanillic acid	121-34-6	Not Available	COC1=C(C=CC(=C1)C(=O)O)O
Methionine	63-68-3	Not Available	CSCCC(C(=O)O)N
caryophyllene oxide	1139-30-6	Not Available	CC1(CC2C1CCC3(C(O3)CCC2=C)C)C
Eugenol	97-53-0	Not Available	COC1=C(C=CC(=C1)CC=C)O
4-Ethenyl-2-methoxyphenol	7786-61-0	Not Available	COC1=C(C=CC(=C1)C=C)O
n-tetradecane	629-59-4	Not Available	CCCCCCCCCCCCCC
n-Nonane	203-913-4	Not Available	CCCCCCCCC
Undecane	1120-21-4	Not Available	CCCCCCCCCCC
senkyunolide G	94530-85-5	Not Available	CCCCC1(C2=C(C=CCC2)C(=O)O1)O
senkyunolide H	94596-27-7	Not Available	CCCC=C1C2=C(C(C(CC2)O)O)C(=O)O1
senkyunolide I	94596-28-8	Not Available	CCCC=C1C2=C(C(C(CC2)O)O)C(=O)O1
5-acetoxymethyl-furaldehyde	10551-58-3	Not Available	CC(=O)OCC1=CC=C(O1)C=O
5-hydromethylfuraldehyde	67-47-0	Not Available	C1=C(OC(=C1)C=O)CO
ferulaldehyde	Not Available	5280536	COC1=C(C=CC(=C1)C=CC=O)O
heptane	142-82-5	Not Available	CCCCCCC
n-octane	111-65-9	Not Available	CCCCCCCC
decane	124-18-5	Not Available	CCCCCCCCCC
Dodecane	112-40-3	Not Available	CCCCCCCCCCCC
n-Tridecane	629-50-5	Not Available	CCCCCCCCCCCCC
n-Pentadecane	629-62-9	Not Available	CCCCCCCCCCCCCCC
cetane	544-76-3	Not Available	CCCCCCCCCCCCCCCC
Eicosane	Not Available	8222	CCCCCCCCCCCCCCCCCCCC
Acetic Acid	64-19-7	Not Available	CC(=O)O
butyric acid	107-92-6	Not Available	CCCC(=O)O
Benzoic acid	65-85-0	Not Available	C1=CC=C(C=C1)C(=O)O
Heptadecanoic acid	506-12-7	Not Available	CCCCCCCCCCCCCCCCC(=O)O
Oleic acid	68609-92-7	Not Available	CCCCCCCC/C=C\CCCCCCCC(=O)O
Methyl pentadecanoate	68937-84-8	Not Available	CCCCCCCCCCCCCCC(=O)OC
methyl hexadecanoate	112-39-0	Not Available	CCCCCCCCCCCCCCCC(=O)OC
Methyl oleate	112-62-9	Not Available	CCCCCCCCC=CCCCCCCCC(=O)OC
Methyl linoleate	112-63-0	5284421	CCCCCC=CCC=CCCCCCCCC(=O)OC
Methyl linolenate	Not Available	5319706	CCC=CCC=CCC=CCCCCCCCC(=O)OC
Dibutyl phthalate	84-74-2	Not Available	CCCCOC(=O)C1=CC=CC=C1C(=O)OCCCC
Gaidic Acid	Not Available	5282743	CCCCCCCCCCCCCC=CC(=O)O
β-Cedrene	Not Available	11106485	CC1CCC2C13CCC(=C)C(C3)C2(C)C
Paeonol	552-41-0	Not Available	CC(=O)C1=C(C=C(C=C1)OC)O
Magnolol	528-43-8	Not Available	C=CCC1=CC(=C(C=C1)O)C2=C(C=CC(=C2)CC=C)O
Isoimperatorin	482-45-1	Not Available	CC(=CCOC1=C2C=CC(=O)OC2=CC3=C1C=CO3)C
Cytidine	65-46-3	Not Available	C1=CN(C(=O)N=C1N)C2C(C(C(O2)CO)O)O
Quercetin	117-39-5	Not Available	C1=CC(=C(C=C1C2=C(C(=O)C3=C(C=C(C=C3O2)O)O)O)O)O
Orientin	28608-75-5	Not Available	C1=CC(=C(C=C1C2=CC(=O)C3=C(O2)C(=C(C=C3O)O)C4C(C(C(C(O4)CO)O)O)O)O)O
Baicalin	21967-41-9	Not Available	C1=CC=C(C=C1)C2=CC(=O)C3=C(C(=C(C=C3O2)OC4C(C(C(C(O4)C(=O)O)O)O)O)O)O
quercetin-3-rhamnoside	522-12-3	Not Available	CC1C(C(C(C(O1)OC2=C(OC3=CC(=CC(=C3C2=O)O)O)C4=CC(=C(C=C4)O)O)O)O)O
3R,8S-falcarindiol	55297-87-5	Not Available	CCCCCCCC=CC(C#CC#CC(C=C)O)O
harmine	442-51-3	5280953	CC1=NC=CC2=C1NC3=C2C=CC(=C3)OC
Ligustilide	4431-01-0	5319022	CCCC=C1C2=C(C=CCC2)C(=O)O1
Z-ligutilide	Not Available	529865	CCCC=C1C2=C(C=CCC2)C(=O)O1
E-ligutilide	Not Available	5877292	CCCC=C1C2=C(C=CCC2)C(=O)O1
Z-butylidenephthalide	551-08-6	642376	CCCC=C1C2=CC=CC=C2C(=O)O1
senkyunolide J	Not Available	24121290	CCCCC1C2=C(C(C(CC2)O)O)C(=O)O1
4-(2-hydroxy-1-methoxyethyl) phenol	Not Available	Not Available	OC1=CC=C(C(OC)CO)C=C1
4-(2-hydroxy-1-ethoxyethyl) phenol	Not Available	Not Available	CCOC(C1=CC=C(O)C=C1)CO
4-hydroxy-3-butylphthalide	Not Available	Not Available	OC1=CC=CC2=C1C(CCCC)OC2=O
6-Butyl-1,4-cycloheptadiene	22735-58-6	Not Available	CCCCC1CC=CCC=C1
E-Butylidenephthalide	Not Available	Not Available	O=C1OC(C2=CC=CC=C21)=CCCC
α-Acoradiene	24048-44-0	Not Available	CC1CCC2(C=C1)C(CC=C2C(C)C)C
β-Acoradiene	28477-64-7	Not Available	CC1CCC(C12CCC(=CC2)C)C(=C)C
γ-Acoradiene	28400-12-6	Not Available	CC1CCC(=C(C)C)C12CCC(=CC2)C
δ-Acoradiene	28400-13-7	Not Available	CC1=CC[C@@]2([C@@H](CC/C2=C(C)\C)C)CC1
Alloocimene	673-84-7	5368821	CC=C(C)C=CC=C(C)C
Angelicide	Not Available	Not Available	O=C1OC2(C3=C1C=CCC3)C4C(CCC5=C4C(O/C5=C\CCC)=O)C2CCC
Anisic acid	1335-08-6	Not Available	COC1=CC=C(C=C1)C(=O)O
Azelaic acid	123-99-9	Not Available	C(CCCC(=O)O)CCCC(=O)O
Bicycloelemene	Not Available	Not Available	CC1CCCC2(C1=CC(=C(C)C)CC2)C
β-Bisabolene	495-61-4	Not Available	CC1=CCC(CC1)C(=C)CCC=C(C)C
Brefeldin A	20350-15-6	Not Available	CC1CCCC=CC2CC(CC2C(C=CC(=O)O1)O)O
3(S)-3-Butyl-4,5-dihydrophthalide	63038-10-8	Not Available	CCCCC1C2=C(C=CCC2)C(=O)O1
3-Butylidene-phalide	551-08-6	Not Available	CCCC=C1C2=CC=CC=C2C(=O)O1
Camphene	79-92-5	Not Available	CC1(C2CCC(C2)C1=C)C
Camphoric acid	Not Available	Not Available	CC1(C(CCC1(C)C(=O)O)C(=O)O)C
Carvacrol	499-75-2	Not Available	CC1=C(C=C(C=C1)C(C)C)O
α-Cedrene	469-61-4	Not Available	CC1CCC2C13CC=C(C(C3)C2(C)C)C
β-Chamigrene	18431-82-8	Not Available	CC1=CCC2(CC1)C(=C)CCCC2(C)C
Choline	62-49-7	Not Available	C[N+](C)(C)CCO
Cnidilide	Not Available	Not Available	CCCCC1C2CCC=CC2C(=O)O1
o-Cresol	95-48-7	Not Available	CC1=CC=CC=C1O
p-Cresol	106-44-5	Not Available	CC1=CC=C(C=C1)O
2,3-Dicresol	526-75-0	Not Available	CC1=C(C(=CC=C1)O)C
Dimethyl azelate	1732-10-1	Not Available	COC(=O)CCCCCCCC(=O)OC
Dimethyl camphorate	Not Available	Not Available	CC1(C(CCC1(C)C(=O)OC)C(=O)OC)C
Dimethyl phthalate	131-11-3	Not Available	COC(=O)C1=CC=CC=C1C(=O)OC
Dimethyl sebacate	106-79-6	Not Available	COC(=O)CCCCCCCCC(=O)OC
Dodecanol	112-53-8	Not Available	CCCCCCCCCCCCO
m-Ethylphenol	62185-53-9	12101	CCC1=CC(=CC=C1)O
p-Ethylphenol	105-79-3	31242	CCC1=CC=C(C=C1)O
4-Ethylresorcinol	2896-60-8	Not Available	CCC1=C(C=C(C=C1)O)O
Ferulic acid	537-98-4	Not Available	COC1=C(C=CC(=C1)C=CC(=O)O)O
Folic acid	59-30-3	Not Available	C1=CC(=CC=C1C(=O)NC(CCC(=O)O)C(=O)O)NCC2=CN=C3C(=N2)C(=O)N=C(N3)N
Folinic acid	58-05-9	143	C1C(N(C2=C(N1)NC(=NC2=O)N)C=O)CNC3=CC=C(C=C3)C(=O)NC(CCC(=O)O)C(=O)O
Hexadecanoic acid	57-10-3	985	CCCCCCCCCCCCCCCC(=O)O
Isocnidilide	Not Available	12315453	CCCCC1C2CCCC=C2C(=O)O
Isoeugenol	3779-61-1	853433	CC=CC1=CC(=C(C=C1)O)OC
Lignoceric acid	557-59-5	Not Available	CCCCCCCCCCCCCCCCCCCCCCCC(=O)O
2-Methyl-dodecane-5-one	477-29-2	5319599	O=C(C([H])([H])C([H])([H])C(C([H])([H])[H])([H])C([H])([H])[H])C([H])([H])C([H])([H])C([H])([H])C([H])([H])C([H])([H])C([H])([H])C([H])([H])[H]
Myristic acid	544-63-8	Not Available	CCCCCCCCCCCCCC(=O)O
Nicotinic acid	59-67-6	Not Available	C1=CC(=CN=C1)C(=O)O
β-Phellandrene	550-10-2	Not Available	CC(C)C1CCC(=C)C=C1
Phenol	108-95-2	Not Available	C1=CC=C(C=C1)O
Phthalic anhydride	85-44-9	Not Available	C1=CC=C2C(=C1)C(=O)OC2=O
Retinol	68-26-8	Not Available	CC1=C(C(CCC1)(C)C)C=CC(=CC=CC(=CCO)C)C
Scopoletin	92-61-5	Not Available	COC1=C(C=C2C(=C1)C=CC(=O)O2)O
Sebacic acid	111-20-6	Not Available	C(CCCCC(=O)O)CCCC(=O)O
Stigmasterol	83-48-7	Not Available	CCC(C=CC(C)C1CCC2C1(CCC3C2CC=C4C3(CCC(C4)O)C)C)C(C)C
Stigmasterol-β-D-glucoside	Not Available	Not Available	CCC(C=CC(C)C1CCC2C1(CCC3C2CC=C4C3(CCC(C4)OC5C(C(C(C(O5)CO)O)O)O)C)C)C(C)C
Succinic acid	110-15-6	Not Available	C(CC(=O)O)C(=O)O
1-Tetradecanol	112-72-1	Not Available	CCCCCCCCCCCCCCO
2,4,6-Trimethylbenzaldehyde	100009-82-3	10254	O=C([H])C1=C(C([H])([H])[H])C([H])=C(C([H])([H])[H])C([H])=C1C([H])([H])[H]
1,1,5-Trimethyl-2-formyl-cyclohexa-2,5-diene-4-one	95258-15-4	Not Available	O=C([H])C1=C([H])C(C(C([H])([H])[H])=C([H])C1(C([H])([H])[H])C([H])([H])[H])=O
Uracil	66-22-8	Not Available	C1=CNC(=O)NC1=O
n-Valerophenone-O-carboxylic acid	550-37-8	Not Available	O=C(O[H])C1=C([H])C([H])=C([H])C([H])=C1C(C([H])([H])C([H])([H])C([H])([H])C([H])([H])[H])=O
Vanillin	121-33-5	Not Available	COC1=C(C=CC(=C1)C=O)O
Vitamin B12	68-19-9	Not Available	CC1=CC2=C(C=C1C)N(C=N2)C3C(C(C(O3)CO)OP(=O)([O-])OC(C)CNC(=O)CCC4(C(C5C6(C(C(C(=C(C7=NC(=CC8=NC(=C(C4=N5)C)C(C8(C)C)CCC(=O)N)C(C7(C)CC(=O)N)CCC(=O)N)C)[N-]6)CCC(=O)N)(C)CC(=O)N)C)CC(=O)N)C)O.[C-]#N.[Co+3]
D-Limonene	17066-67-0	440917	CC1=CCC(CC1)C(=C)C
beta-Selinene	77160-91-9	442393	CC(=C)C1CCC2(CCCC(=C)C2C1)C
Nonanal	91-10-1	31289	CCCCCCCCC=O
Decanal	12385-08-9	8175	CCCCCCCCCC=O
Safrol	1406-55-9	5144	C=CCC1=CC2=C(C=C1)OCO2
Moslene/GAMMA-TERPINENE	27400-72-2	7461	CC1=CCC(=CC1)C(C)C
(+)-alpha-Terpineol	26531-51-1	442501	CC1=CCC(CC1)C(C)(C)O
(+)-3-Carene	8045-27-0	443156	CC1=CCC2C(C1)C2(C)C
Sitogluside	37831-70-2	5742590	CCC(CCC(C)C1CCC2C1(CCC3C2CC=C4C3(CCC(C4)OC5C(C(C(C(O5)CO)O)O)O)C)C)C(C)C
D-galacturonic acid	529-59-9	84740	C(=O)C(C(C(C(C(=O)O)O)O)O)O
Cis-ferulic acid	25525-15-9	1548883	COC1=C(C=CC(=C1)C=CC(=O)O)O
Eucarvone	556-18-3	136330	CC1=CC=CC(CC1=O)(C)C
(+)-gamma-cadinene	22255-40-9	6432404	CC1=CC2C(CC1)C(=C)CCC2C(C)C
Heptanal	823-40-5	8130	CCCCCCC=O
(+)-endo-beta-bergamotene	124-06-1	12300073	CC(=CCCC1(C2CCC(=C)C1C2)C)C
4-isopropylbenzaldehyde	1338-46-1	326	CC(C)C1=CC=C(C=C1)C=O
1-TRIDECENE	87-51-4	17095	CCCCCCCCCCCC=C
VERBENONE	108-24-7	65724	CC1=CC(=O)C2CC1C2(C)C
2'-Hydroxy-5'-methylacetophenone	79-63-0	15068	CC1=CC(=C(C=C1)O)C(=O)C
Azelex	2445-82-1	19347555	[H+].[H+].C(CCCC(=O)[O-])CCCC(=O)[O-]
Ledol	68988-18-1	92812	CC1CCC2C1C3C(C3(C)C)CCC2(C)O
Decanoic acid	187997-16-6	2969	CCCCCCCCCC(=O)O
Adenine	54976-54-4	190	C1=NC2=C(N1)C(=NC=N2)N
(R)-Cuparene	85566-12-7	86895	CC1=CC=C(C=C1)C2(CCCC2(C)C)C
(-)-Thujopsene	118374-94-0	442402	CC1=CCC2(CCCC(C23C1C3)(C)C)C
3-Butylidene-7-hydroxyphthalide	7069-41-2	5281559	CCCC=C1C2=C(C(=CC=C2)O)C(=O)O1
Levistolid A	66026-80-0	70698035	CCCC=C1C2=C(C3C(CC2)C4CCC35C(=C4)C(=O)OC5=CCCC)C(=O)O1
Alloocimene	51225-30-0	5368821	CC=C(C)C=CC=C(C)C
senkyunolide-C	16545-23-6	Not Available	OC(C1=C(C(OC)=C2OC)OC(C(C=C3)=CC=C3O)=CC1=O)=C2OC
senkyunolide-D/Esculetin	305-01-1	5281416	C1=CC(=O)OC2=CC(=C(C=C21)O)O
4-OCTANONE	141850-72-8	11516	CCCCC(=O)CCC
2-METHYL-3-BUTEN-2-OL	32659-21-5	8257	CC(C)(C=C)O
BETA-CADINENE	55128-06-8	10657	CC1=CCC2C(C1)C(CC=C2C)C(C)C
P-Mentha-1(7),3-diene	2922-51-2	66841	CC(C)C1=CCC(=C)CC1
Butanal	60186-78-9	261	CCCC=O
1-Hexadecanol	9007-33-4	2682	CCCCCCCCCCCCCCCCO
3,4-DIMETHYLBENZALDEHYDE	474-58-8	22278	CC1=C(C=C(C=C1)C=O)C
4-ETHYLBENZALDEHYDE	4602-84-0	20861	CCC1=CC=C(C=C1)C=O
2,3,5-trimethylbenzene-1,4-diol	92760-25-3	12785	CC1=CC(=C(C(=C1O)C)C)O
(1R,2S,4R)-1-ethyl-1-methyl-2,4-di(propan-2-yl)cyclohexane	80454-42-8	12309447	CCC1(CCC(CC1C(C)C)C(C)C)C
1-DODECENE	13382-86-0	8183	CCCCCCCCCCC=C
[(2R)-2-formyloxy-3-phosphonooxypropyl] formate	695-06-7	25163993	C(C(COP(=O)(O)O)OC=O)OC=O
1,2-Dimyristoyl-sn-glycero-3-phosphoethanolamine	38412-47-4	9852308	CCCCCCCCCCCCCC(=O)OCC(COP(=O)(O)OCCN)OC(=O)CCCCCCCCCCCCC
phosphatidylinositol	53657-29-7	53477912	C(C(COP(=O)(O)OC1C(C(C(C(C1O)O)O)O)O)OC=O)OC=O
(3R,3aS)-3-butyl-3a,4,5,6-tetrahydro-3H-2-benzofuran-1-one	58139-23-4	12315451	CCCCC1C2CCCC=C2C(=O)O1
(3R)-3-butyl-4,5-dihydro-3H-2-benzofuran-1-one	78277-79-9	54753664	CCCCC1C2=C(C=CCC2)C(=O)O1
sphingomyelin	5187-84-8	5353953	CCCCCCCCCCCCCCCCCC(=O)NC(COP(=O)([O-])OCC[N+](C)(C)C)C(C=CCCCCCCCCCCCCC)O
Isotetandrine	66211-83-4	5351212	CN1CCC2=CC(=C3C=C2C1CC4=CC=C(C=C4)OC5=C(C=CC(=C5)CC6C7=C(O3)C(=C(C=C7CCN6C)OC)OC)OC)OC
α-acoradiene	94021-48-4	6429151	CC1CCC2(C=C1)C(CC=C2C(C)C)C
α-copaene	31427-08-4	25245021	CC1=CCC2C3C1C2(CCC3C(C)C)C
4-epi-alpha-acoradiene	55950-32-8	13743810	CC1CCC(C12CCC(=CC2)C)C(=C)C
QENWKTQYINCUOX-UHFFFAOYSA-	149998-48-1	11832833	C1=CC=C(C=C1)C2=CC(=S)C=C(S2)C3=CC=CC=C3
(4S,6R)-2,4,6-trimethyloctane	217476-73-8	59734807	CCC(C)CC(C)CC(C)C
2,5-DIMETHYLBENZALDEHYDE	632-32-6	22015	CC1=CC(=C(C=C1)C)C=O
(3E)-3-Octadecene	122021-74-3	5365984	CCCCCCCCCCCCCCC=CCC
Trans-2-Hexenyl caproate	139051-27-7	5352973	CCCCCC(=O)OCC=CCCC
2-Methylhexadecanoic acid	90052-87-2	117384	CCCCCCCCCCCCCCC(C)C(=O)O
Cis-Isoeugenol	42719-32-4	1549041	C/C=C\C1=CC(=C(C=C1)O)OC
2-methyl-5-decanone	179457-66-0	537777	CCCCCC(=O)CCC(C)C
(3R,7R)-3,7-dimethylnonane	751-29-1	42626759	CCC(C)CCCC(C)CC
(4R)-4-methylhept-6-en-3-one	52705-93-8	25018179	CCC(=O)C(C)CC=C
5-Hydroxyindole	508-55-4	16054	C1=CC2=C(C=CN2)C=C1O
6-UNDECANOL	501-98-4	32045	CCCCCC(CCCCC)O
7,10-Pentadecadiynoicacid	52286-59-6	30942	CCCCC#CCC#CCCCCCC(=O)O
AC1LAIPP	128887-82-1	488866	CN1C=C(C=C1C(=O)NCCN2CCOCC2)NC(=O)C3=CC(=CN3C)NC(=O)C4=CC(=CN4C)NC(=O)C5=NSC(=C5Cl)NCCC6=CC=CC=N6
6-UNDECANONE	41744-39-2	13561	CCCCCC(=O)CCCCC
Isoamylbenzene	37744-61-9	16294	CC(C)CCC1=CC=CC=C1
2-Butenoic acid	14259-55-3	6440421	CC=C(C)C(=O)OCC(=CC)C(=O)O
Tropone	123-63-7	10881	C1=CC=CC(=O)C=C1
(1aR,4aS,7R,7aS,7bS)-1,1,7-trimethyl-4-methylidene-2,3,4a,5,6,7,7a,7b-octahydro-1aH-cyclopropa[e]azulene	77-52-1	12305247	CC1CCC2C1C3C(C3(C)C)CCC2=C
(3E)-3-butylidene-7-hydroxy-2-benzofuran-1-one	61303-13-7	5852943	CCCC=C1C2=C(C(=CC=C2)O)C(=O)O1
Coniferyl ferulate	6812-98-2	6441913	COC1=C(C=CC(=C1)C=CCOC(=O)C=CC2=CC(=C(C=C2)O)OC)O
1,2-Dimyristoyl-sn-glycero-3-phosphocholine	7224-66-0	5313082	CCCCCCCCCCCCCC(=O)OCC(COP(=O)(O)OCC[N+](C)(C)C)OC(=O)CCCCCCCCCCCCC
2,4-Dimethylbenzaldehyde	56485-42-8	61814	CC1=CC(=C(C=C1)C=O)C

## Sheet: bai-shao
Compound Name	CAS ID	Pubchem ID	SMILES
30-norhederagenin	Not Available	21596158	CC12CCC(C(C1CCC3(C2CC=C4C3(CCC5(C4CC(=C)CC5)C(=O)O)C)C)(C)CO)O
paeonivayin	Not Available	46882920	CC12CC(C3CC1(C3(C(=O)O2)COC(=O)C4=CC=CC=C4)OC5C(C(C(C(O5)COC(=O)C6=CC=CC=C6)O)O)O)O
Palmitic acid	57-10-3	985	CCCCCCCCCCCCCCCC(=O)O
Phenylalanine	673-31-4	6140	C1=CC=C(C=C1)CC(C(=O)O)N
Pyrogallol	87-66-1	1057	C1=CC(=C(C(=C1)O)O)O
Betulinic acid	472-15-1	64971	CC(=C)C1CCC2(C1C3CCC4C5(CCC(C(C5CCC4(C3(CC2)C)C)(C)C)O)C)C(=O)O
Benzoic acid	65-85-0	20144841	[H+].C1=CC=C(C=C1)C(=O)[O-]
oleanolic acid	508-02-1	10494	CC1(CCC2(CCC3(C(=CCC4C3(CCC5C4(CCC(C5(C)C)O)C)C)C2C1)C)C(=O)O)C
beta-sitosterol	83-46-5	222284	CCC(CCC(C)C1CCC2C1(CCC3C2CC=C4C3(CCC(C4)O)C)C)C(C)C
kaempferol	520-18-3	5280863	C1=CC(=CC=C1C2=C(C(=O)C3=C(C=C(C=C3O2)O)O)O)O
Cianidanol	154-23-4	9064	C1C(C(OC2=CC(=CC(=C21)O)O)C3=CC(=C(C=C3)O)O)O
Gallic acid	149-91-7	370	C1=C(C=C(C(=C1O)O)O)C(=O)O
Hederagenol	465-99-6	73299	CC1(CCC2(CCC3(C(=CCC4C3(CCC5C4(CCC(C5(C)CO)O)C)C)C2C1)C)C(=O)O)C
Astragalin	480-10-4	5282102	C1=CC(=CC=C1C2=C(C(=O)C3=C(C=C(C=C3O2)O)O)O[C@H]4[C@@H]([C@H]([C@@H]([C@H](O4)CO)O)O)O)O
Tridecane	629-50-5	12388	CCCCCCCCCCCCC
ALPHA-CEDRENE	69-61-4	6431015	CC1CCC2C13CC=C(C(C3)C2(C)C)C
Dibutyl phthalate	84-74-2	3026	CCCCOC(=O)C1=CC=CC=C1C(=O)OCCCC
ETHYL ACETATE	141-78-6	8857	CCOC(=O)C
stearic acid	609343-71-7	5281	CCCCCCCCCCCCCCCCCC(=O)O
Heptadekan	629-78-7	12398	CCCCCCCCCCCCCCCCC
EICOSANE	112-95-8	8222	CCCCCCCCCCCCCCCCCCCC
Henicosane	629-94-7	12403	CCCCCCCCCCCCCCCCCCCCC
paeonol	552-41-0	11092	CC(=O)C1=C(C=C(C=C1)OC)O
Cedrol	77-53-2	65575	CC1CCC2C13CCC(C(C3)C2(C)C)(C)O
1-DODECANOL	8032-08-4	8193	CCCCCCCCCCCCO
(1R)-(+)-Nopinone	77982-63-9	157139	CC1(C2CCC(=O)C1C2)C
myristic acid	45184-05-2	11005	CCCCCCCCCCCCCC(=O)O
PENTADECYLIC ACID	1002-84-2	13849	CCCCCCCCCCCCCCC(=O)O
Octacosane	630-02-4	12408	CCCCCCCCCCCCCCCCCCCCCCCCCCCC
Dodecanal	112-54-9	8194	CCCCCCCCCCCC=O
salicylic acid	7681-06-3	338	C1=CC=C(C(=C1)C(=O)O)O
Cyclohexanol, 2,2-dimethyl-, (1S)-	1193-46-0	638180	CC1(CCCCC1O)C
Methyl linolelaidate	2566-97-4	5362793	CCCCCC=CCC=CCCCCCCCC(=O)OC
(E)-octadec-9-ene	7206-25-9	5364599	CCCCCCCCC=CCCCCCCCC
9-methylenefluorene	4425-82-5	78147	C=C1C2=CC=CC=C2C3=CC=CC=C13
Dipropyl phthalate	131-16-8	8559	CCCOC(=O)C1=CC=CC=C1C(=O)OCCC
(2R,3R)-butane-2,3-diol	513-85-9	225936	CC(C(C)O)O
DOTRIACONTANE	544-85-4	11008	CCCCCCCCCCCCCCCCCCCCCCCCCCCCCCCC
2,6-DI-TERT-BUTYLPHENOL	128-39-2	31405	CC(C)(C)C1=C(C(=CC=C1)C(C)(C)C)O
[(1R,5S)-6,6-dimethyl-4-bicyclo[3.1.1]hept-3-enyl]methanol	515-00-4	636475	CC1(C2CC=C(C1C2)CO)C
(+)-trans-Myrtanol	15358-91-5	84880	CC1(C2CCC(C1C2)CO)C
Acetyl oxide	108-24-7	7918	CC(=O)OC(=O)C
(6S,10S)-6,10,14-trimethylpentadecan-2-one	502-69-2	1810797	CC(C)CCCC(C)CCCC(C)CCCC(=O)C
23-hydroxybetulinic acid	85999-40-2	21672692	CC(=C)C1CCC2(C1C3CCC4C5(CCC(C(C5CCC4(C3(CC2)C)C)(C)CO)O)C)C(=O)O
24-Methylenecycloartanol	1449-09-8	94204	CC(C)C(=C)CCC(C)C1CCC2(C1(CCC34C2CCC5C3(C4)CCC(C5(C)C)O)C)C
Methylgallate	99-24-1	7428	COC(=O)C1=CC(=C(C(=C1)O)O)O
ETHYL GALLATE	52441-13-1	13250	CCOC(=O)C1=CC(=C(C(=C1)O)O)O
Propyl (2S)-2-hydroxypropanoate	616-09-1	10654258	CCCOC(=O)C(C)O
Tannic acid	1401-55-4	16133691	CC(C(=O)CC1C(C(C(C(O1)COC(=O)C2=CC(=C(C=C2)O)OC(=O)C3=CC(=C(C=C3)O)OC(=O)C4=CC(=O)C(=O)C=C4)OC(=O)C5=CC(=C(C=C5)O)OC(=O)C6=CC(=C(C=C6)O)OC(=O)C7=CC(=O)C(=O)C(=C7)O)OC(=O)C8=CC(=C(C=C8)O)OC(=O)C9=CC(=O)C(=O)C(=C9)OC(=O)C1=CC(=C(C=C1)O)OC(=O)C1=CC(=O)C(=O)C(=C1)O)OC(=O)C1=CC(=C(C=C1)O)OC(=O)C1=CC(=C(C=C1)O)OC(=O)C1=CC(=O)C(=O)C(=C1)O)O
paeonoside	25615-14-9	52952637	CC(=O)OCC1C(C(C(C(O1)OC2=CC(=C3C(=C2)OC(=C(C3=O)OC4C(C(C(C(O4)COC(=O)C)OC(=O)C)OC(=O)C)OC(=O)C)C5=CC=C(C=C5)OC(=O)C)OC(=O)C)OC(=O)C)OC(=O)C)OC(=O)C
paeoniflorgenone	80454-42-8	133475	CC12CC(=O)C3CC1(OC(C3COC(=O)C4=CC=CC=C4)O2)O
Palbinone	139954-00-0	9841735	CC1(C2CCC3(C(C2(CCC1O)C)C=CC4=C(C(=O)C(=O)C43C)O)C)C
Lactiflorin	88623-95-4	5318917	CC12CC3C4(CC1C4(C(=O)O2)COC(=O)C5=CC=CC=C5)OC6C(C(C(OC6O3)CO)O)O
2-Hexyl-1-decanol	2425-77-6	95337	CCCCCCCCC(CCCCCC)CO
Paeonilactone C	98751-77-0	10471123	CC1(CC2C(CC1=O)C(C(=O)O2)COC(=O)C3=CC=CC=C3)O
paeoniflorin	23180-57-6	442534	CC12CC3(C4CC1(C4(C(O2)O3)COC(=O)C5=CC=CC=C5)OC6C(C(C(C(O6)CO)O)O)O)O
1,2,3,6-tetra-O-galloylglucose	79886-50-3	Not Available	Not Available
albiflorin	39011-90-0	24868421	CC12CC(C3CC1(C3(C(=O)O2)COC(=O)C4=CC=CC=C4)OC5C(C(C(C(O5)CO)O)O)O)O
Daucosterol	474-58-8	5742590	CCC(CCC(C)C1CCC2C1(CCC3C2CC=C4C3(CCC(C4)OC5C(C(C(C(O5)CO)O)O)O)C)C)C(C)C
benzoyl paeoniflorin	38642-49-8	46882878	CC12CC3(C4CC1(C4(C(O2)O3)COC(=O)C5=CC=CC=C5)OC6C(C(C(C(O6)COC(=O)C7=CC=CC=C7)O)O)O)O
4-Chlorobutyric acid	627-00-9	12300	C(CC(=O)O)CCl
galloylpaeoniflorin	122965-41-7	46882879	CC12CC3(C4CC1(C4(C(O2)O3)COC(=O)C5=CC=CC=C5)OC6C(C(C(C(O6)COC(=O)C7=CC(=C(C(=C7)O)O)O)O)O)O)O
oxypaeoniflorin	39011-91-1	429559	CC12CC3(C4CC1(C4(C(O2)O3)COC(=O)C5=CC=C(C=C5)O)OC6C(C(C(C(O6)CO)O)O)O)O
Paeonilactone A	98751-79-2	10081437	CC1C2CC(=O)C(CC2OC1=O)(C)O
Paeonilactone B	98751-78-1	10375422	CC1(CC2C(CC1=O)C(=C)C(=O)O2)O
cis-5-Octen-1-ol	64275-73-6	5352837	CC/C=C\CCCCO
5-Hexen-3-one	24253-30-3	141082	CCC(=O)CC=C
Pentagalloylglucose	14937-32-7	65238	C1=C(C=C(C(=C1O)O)O)C(=O)OCC2C(C(C(C(O2)OC(=O)C3=CC(=C(C(=C3)O)O)O)OC(=O)C4=CC(=C(C(=C4)O)O)O)OC(=O)C5=CC(=C(C(=C5)O)O)O)OC(=O)C6=CC(=C(C(=C6)O)O)O
Albiflorin R1	Not Available	Not Available	Not Available
Casuarictin	79786-00-8	73644	C1C2C(C3C(C(O2)OC(=O)C4=CC(=C(C(=C4)O)O)O)OC(=O)C5=CC(=C(C(=C5C6=C(C(=C(C=C6C(=O)O3)O)O)O)O)O
Casuariin	79786-04-2	14035442	C1C(C(OC(=O)C2=CC(=C(C(=C2C3=C(C(=C(C=C3C(=O)O1)O)O)O)O)O)O)C4C5C(C6=C(C(=C(C(=C6C(=O)O5)C7=C(C(=C(C=C7C(=O)O4)O)O)O)O)O)O)O)O
5-Desgalloylstachyurin	115406-24-1	10417809	C1C(C(OC(=O)C2=CC(=C(C(=C2C3=C(C(=C(C=C3C(=O)O1)O)O)O)O)O)O)C4C5C(C6=C(C(=C(C(=C6C(=O)O5)C7=C(C(=C(C=C7C(=O)O4)O)O)O)O)O)O)O)O
Eugeniin	58970-75-5	442679	C1C2C(C(C(C(O2)OC(=O)C3=CC(=C(C(=C3)O)O)O)OC(=O)C4=CC(=C(C(=C4)O)O)O)OC(=O)C5=CC(=C(C(=C5)O)O)O)OC(=O)C6=CC(=C(C(=C6C7=C(C(=C(C=C7C(=O)O1)O)O)O)O)O)O
1-O-Galloyl-glucose	Not Available	124021	C1=C(C=C(C(=C1O)O)O)C(=O)OC2C(C(C(C(O2)CO)O)O)O
13-Methyl tetradecanoic acid	2485-71-4	Not Available	Not Available
Paeonianin E	Not Available	46883515	CC12CC(=O)C3CC1(C3(C(O2)OCC4C(C(C(C(O4)OC56CC7C5(C8OC6(CC7(O8)O)C)COC(=O)C9=CC=CC=C9)O)O)O)COC(=O)C1=CC=CC=C1)OC1C(C(C(C(O1)CO)O)O)O
Paeonianin A	Not Available	44253993	CC12CC(=O)C3CC1(C3(C(O2)OC)COC(=O)C4=CC=CC=C4)OC5C(C(C(C(O5)COC(=O)C6=CC=CC=C6)O)O)O
Paeonianin C	Not Available	46883513	CC12CC(=O)C3CC1(C3(C(O2)OC)COC(=O)C4=CC=C(C=C4)O)OC5C(C(C(C(O5)COC(=O)C6=CC=CC=C6)O)O)O
Paeonianin D	Not Available	46883514	CC12CC(=O)C3CC1(C3(C(O2)OC)COC(=O)C4=CC=CC=C4)OC5C(C(C(C(O5)COC6C7(C8CC7(C(O6)(CC8=O)C)OC9C(C(C(C(O9)CO)O)O)O)COC(=O)C1=CC=CC=C1)O)O)O
Pedunculagin	7045-42-3	442688	C1C2C(C3C(C(O2)O)OC(=O)C4=CC(=C(C(=C4C5=C(C(=C(C=C5C(=O)O3)O)O)O)O)O)O)OC(=O)C6=CC(=C(C(=C6C7=C(C(=C(C=C7C(=O)O1)O)O)O)O)O)O
Peonin	132-37-6	44256843	COC1=C(C=CC(=C1)C2=C(C=C3C(=CC(=CC3=[O+]2)O)OC4C(C(C(C(O4)CO)O)O)O)OC5C(C(C(C(O5)CO)O)O)O)O
Phenol	108-95-2	996	C1=CC=C(C=C1)O
Pyrethrin I	121-21-1	579153	CC1=C(C(=O)CC1OC(=O)C2C(C2(C)C)C=C(C)C)CC=CC=C
Pyrethrin II	121-29-9	6433155	CC1=C(C(=O)CC1OC(=O)C2C(C2(C)C)C=C(C)C(=O)OC)CC=CC=C
Strictinin	517-46-4	73330	C1C2C(C(C(C(O2)OC(=O)C3=CC(=C(C(=C3)O)O)O)O)O)OC(=O)C4=CC(=C(C(=C4C5=C(C(=C(C=C5C(=O)O1)O)O)O)O)O)O

## Sheet: chuan-xiong
Compound Name	CAS ID	Pubchem ID	SMILES
nonylbenzene	1081-77-2	14126	CCCCCCCCCC1=CC=CC=C1
Spathulenol	Not Available	522266	CC1(C2C1C3C(CCC3(C)O)C(=C)CC2)C
9-octadecenoic acid[2]-ethylester	111-62-6	8123	CCCCCCCCC=CCCCCCCCC(=O)OCC
eicosane	112-95-8	8222	CCCCCCCCCCCCCCCCCCCC
2-methyl eicosane	1560-84-5	519146	CCCCCCCCCCCCCCCCCCC(C)C
9,12,15-octadecatrienoic acid methyl ester	301-00-8	9316	CCC=CCC=CCC=CCCCCCCCC(=O)OC
16-octadecenoic acid methyl ester	56554-49-5	5364513	CC=CCCCCCCCCCCCCCCC(=O)OC
9-octadecenoic acid methyl ester	2462-84-2	8202	CCCCCCCCC=CCCCCCCCC(=O)OC
octadecanoic acid methyl ester	112-61-8	8201	CCCCCCCCCCCCCCCCCC(=O)OC
4-Hydroxybenzoic acid	99-96-7	135	C1=CC(=CC=C1C(=O)O)O
Protocatechualdehyde	139-85-5	8768	C1=CC(=C(C=C1C=O)O)O
z-ligustilide	Not Available	529865	CCCC=C1C2=C(C=CCC2)C(=O)O1
3-carene	13466-78-9	26049	CC1=CCC2C(C1)C2(C)C
limonene	138-86-3	22311	CC1=CCC(CC1)C(=C)C
succinic acid	110-15-6	1110	C(CC(=O)O)C(=O)O
heptadecanoic acid	506-12-7	10465	CCCCCCCCCCCCCCCCC(=O)O
MONOPALMITIN	542-44-9	14900	CCCCCCCCCCCCCCCC(=O)OCC(CO)O
3(R), 8 (S), 9(Z)2falcarindiol	225110-25-8	5281148	CCCCCCCC=CC(C#CC#CC(C=C)O)O
β-Terpineol	Not Available	5885030	COC1=CC(=CC(=C1OC2C(C(C(C(O2)CO)O)O)O)OC)C=CCO
Terpinen-4-ol	562-74-3	11230	CC1=CCC(CC1)(C(C)C)O
Eugenol	97-53-0	3314	COC1=C(C=CC(=C1)CC=C)O
DihydrocurcuMin	Not Available	10429233	COC1=C(C=CC(=C1)CCC(=O)CC(=O)/C=C/C2=CC(=C(C=C2)O)OC)O
ALPHA-PHELLANDRENE	99-83-2	7460	CC1=CCC(C=C1)C(C)C
1-PHENYL-1-PENTYNE	4250-81-1	77923	CCCC#CC1=CC=CC=C1
Decahydronaphthalene	91-17-8	7044	C1CCC2CCCCC2C1
2-Chloroacetophenone	532-27-4	10757	C1=CC=C(C=C1)C(=O)CCl
(+)-TRANS-LIMONENE 1,2-EPOXIDE	6909-30-4	449290	C1=CC=C(C=C1)C(=O)CCl
spathalenol	Not Available	92231	CC1(C2C1C3C(CCC3(C)O)C(=C)CC2)C
Cedrenol	28231-03-0	119831	CC1CCC2C13CC(C2(C)C)C(=C)C(C3)O
CARYOPHYLLENE OXIDE	1139-30-6	1742210	CC1(CC2C1CCC3(C(O3)CCC2=C)C)C
Myristic acid	544-63-8	11005	CCCCCCCCCCCCCC(=O)O
1-PENTADECANOL	629-76-5	12397	CCCCCCCCCCCCCCCO
PENTADECANOIC ACID	1002-84-2	13849	CCCCCCCCCCCCCCC(=O)O
1-HEPTADECANOL	1454-85-9	15076	CCCCCCCCCCCCCCCCCO
PHYTOL	150-86-7	5366244	CC(C)CCCC(C)CCCC(C)CCCC(=CCO)C
alpha-Cypermethrin	67375-30-8	12617365	CC1(C(C1C(=O)OC(C#N)C2=CC(=CC=C2)OC3=CC=CC=C3)C=C(Cl)Cl)C
Dibutyl phthalate	84-74-2	3026	CCCCOC(=O)C1=CC=CC=C1C(=O)OCCCC
Apigenin	520-36-5	5280443	C1=CC(=CC=C1C2=CC(=O)C3=C(C=C(C=C3O2)O)O)O
alpha-thujene	2867-05-2	17868	CC1=CCC2(C1C2)C(C)C
alpha-pinene	80-56-8	6654	CC1=CCC2CC1C2(C)C
sabinene	3387-41-5	18818	CC(C)C12CCC(=C)C1C2
beta-pinene	127-91-3	14896	CC1(C2CCC(=C)C1C2)C
n-octanol	111-87-5	957	CCCCCCCCO
alpha-terpinolene	586-62-9	11463	CC1=CCC(=C(C)C)CC1
linalool	78-70-6	6549	CC(=CCCC(C)(C=C)O)C
myrcenol	543-39-5	10975	CC(C)(CCCC(=C)C=C)O
n-butyl angelate	Not Available	5364789	CCCCOC(=O)C(=CC)C
camphor	76-22-2	2537	CC1(C2CCC1(C(=O)C2)C)C
isoborneol	124-76-5	512289	CC1(C2CCC1(C(C2)O)C)C
alpha-terpincol	8000-41-7	17100	CC1=CCC(CC1)C(C)(C)O
n-decanal	112-31-2	8175	CCCCCCCCCC=O
verbenone	1196-01-6	29025	CC1=CC(=O)C2CC1C2(C)C
carvone	99-49-0	7439	CC1=CCC(CC1=O)C(=C)C
piperitone	89-81-6	6987	CC1=CC(=O)C(CC1)C(C)C
bornyl acetate	76-49-3	6448	CC(=O)OC1CC2CCC1(C2(C)C)C
undecanal	112-44-7	8186	CCCCCCCCCCC=O
carvacrol	499-75-2	10364	CC1=C(C=C(C=C1)C(C)C)O
beta-catyophyllene	87-44-5	5281515	CC1=CCCC(=C)C2CC(C2CC1)(C)C
gamma-patchoulene	Not Available	521302	CC1CCC23C1CC(C2(C)C)CCC3=C
Methyl 3,4-dimethylbenzoate	38404-42-1	520902	CC1=C(C=C(C=C1)C(=O)OC)C
7-Methoxybenzofuran-2-carboxylic acid	4790-79-8	606037	COC1=CC=CC2=C1OC(=C2)C(=O)O
4-N-HEPTYLPHENOL	1987-50-4	16143	CCCCCCCC1=CC=C(C=C1)O
o-Cresol	95-48-7	335	CC1=CC=CC=C1O
Comphene	565-00-4	6616	CC1(C2CCC(C2)C1=C)C
p-Cresol	106-44-5	2879	CC1=CC=C(C=C1)O
2-Methyl-1-phenyl-2-propanol	100-86-7	7531	CC(C)(CC1=CC=CC=C1)O
2'-Hydroxy-4'-methylacetophenone	6921-64-8	81338	CC1=CC(=C(C=C1)C(=O)C)O
Butyraldehyde	123-72-8	261	CCCC=O
ISOAMYLBENZENE	2049-94-7	16294	CC(C)CCC1=CC=CC=C1
TROPONE	539-80-0	10881	C1=CC=CC(=O)C=C1
5-Hydroxyindole	1953-54-4	16054	C1=CC2=C(C=CN2)C=C1O
8-Quinolinemethanol	16032-35-2	594412	C1=CC2=C(C(=C1)CO)N=CC=C2
SEDANOLIDE	6415-59-4	5018391	CCCCC1C2CCCC=C2C(=O)O1
BETA-ELEMENE	33880-83-0	6918391	CC(=C)C1CCC(C(C1)C(=C)C)(C)C=C
1,3-Butanediol	107-88-0	7896	CC(CCO)O
Squalene	7683-64-9	638072	CC(=CCCC(=CCCC(=CCCC=C(C)CCC=C(C)CCC=C(C)C)C)C)C
Butyric Acid	107-92-6	264	CCCC(=O)O
OCIMENE	13877-91-3	5281553	CC(=CCC=C(C)C=C)C
tridecane	629-50-5	12388	CCCCCCCCCCCCC
linalyl propionate	144-39-8	61098	CCC(=O)OC(C)(CCC=C(C)C)C=C
γ-elemene	Not Available	6432312	CC(=C1CCC(C(C1)C(=C)C)(C)C=C)C
(+)-Camphene	5794-03-6	92221	CC1(C2CCC(C2)C1=C)C
alpha-humulene	19132-75-3	5281520	CC1=CCC(C=CCC(=CCC1)C)(C)C
alpha-Curcumene	4176-17-4	442360	CC1=CC=C(C=C1)C(C)CCC=C(C)C
2-[(1R,3S,4S)-3-isopropenyl-4-methyl-4-vinylcyclohexyl]propan-2-ol	639-99-6	92138	CC(=C)C1CC(CCC1(C)C=C)C(C)(C)O
beta-Selinene	17066-67-0	442393	CC(=C)C1CCC2(CCCC(=C)C2C1)C
palmitic acid	67701-02-4	985	CCCCCCCCCCCCCCCC(=O)O
vanillic acid	121-34-6	8468	COC1=C(C=CC(=C1)C(=O)O)O
Nonanal	75718-12-6	31289	CCCCCCCCC=O
P-CYMENE	4939-75-7	7463	CC1=CC=C(C=C1)C(C)C
(L)-alpha-Terpineol	10482-56-1	443162	CC1=CCC(CC1)C(C)(C)O
1,8-cineole	470-82-6	2758	CC1(C2CCC(O1)(CC2)C)C
(-)-alpha-Pinene	7785-26-4	440968	CC1=CCC2CC1C2(C)C
(-)-nopinene	18172-67-3	440967	CC1(C2CCC(=C)C1C2)C
EIC	2197-37-7	5280450	CCCCCC=CCC=CCCCCCCCC(=O)O
2-[(2S,5S,6S)-6,10-dimethylspiro[4.5]dec-9-en-2-yl]propan-2-ol	1460-73-7	10353528	CC1CCC=C(C12CCC(C2)C(C)(C)O)C
Furol	98-01-1	7362	C1=COC(=C1)C=O
L-Bornyl acetate	6626-35-3	93009	CC(=O)OC1CC2CCC1(C2(C)C)C
Myrcene	123-35-3	31253	CC(=CCCC(=C)C=C)C
(R)-linalool	126-91-0	443158	CC(=CCCC(C)(C=C)O)C
(S)-(+)-alpha-Phellandrene	2243-33-6	443160	CC1=CCC(C=C1)C(C)C
Moslene	99-85-4	7461	CC1=CCC(=CC1)C(C)C
-cis-.beta.-Elemene diastereomer	515-13-9	6431152	CC(=C)C1CCC(C(C1)C(=C)C)(C)C=C
Methyleugenol	93-15-2	7127	COC1=C(C=C(C=C1)CC=C)OC
Aromadendrene	489-39-4	11095734	CC1CCC2C1C3C(C3(C)C)CCC2=C
caffeic acid	71693-97-5	689043	C1=CC(=C(C=C1C=CC(=O)O)O)O
L-Limonen	5989-54-8	439250	CC1=CCC(CC1)C(=C)C
(1S,5S)-1-isopropyl-4-methylenebicyclo[3.1.0]hexane	87-41-5	11051711	CC(C)C12CCC(=C)C1C2
Undekansaeure	112-37-8	8180	CCCCCCCCCCC(=O)O
daucosterol	474-58-8	5742590	CCC(CCC(C)C1CCC2C1(CCC3C2CC=C4C3(CCC(C4)OC5C(C(C(C(O5)CO)O)O)O)C)C)C(C)C
sitosterol	83-46-5	12303645	CCC(CCC(C)C1CCC2C1(CCC3C2CC=C4C3(CCC(C4)O)C)C)C(C)C
FERULIC ACID (CIS)	25525-15-9	1548883	COC1=C(C=CC(=C1)C=CC(=O)O)O
Terpinen-4-ol	2438-10-0	2724161	CC1=CCC(CC1)(C(C)C)O
vanillin	121-33-5	1183	COC1=C(C=CC(=C1)C=O)O
hexanal	66-25-1	6184	CCCCCC=O
PENTYLFURAN	64079-01-2	19602	CCCCCC1=CC=CO1
oleic acid	17156-84-2	445639	CCCCCCCCC=CCCCCCCCC(=O)O
(R)-(-)-alpha-Phellandrene	4221-98-1	442482	CC1=CCC(C=C1)C(C)C
Heptaldehyde	111-71-7	8130	CCCCCCC=O
OYA	124-13-0	454	CCCCCCCC=O
o-Cymol	1329-98-2	10703	CC1=CC=CC=C1C(C)C
sucrose	25702-74-3	5988	C(C1C(C(C(C(O1)OC2(C(C(C(O2)CO)O)O)CO)O)O)O)O
stearic acid	609343-71-7	5281	CCCCCCCCCCCCCCCCCC(=O)O
Pentadecane	629-62-9	12391	CCCCCCCCCCCCCCC
methyl palmitate	112-39-0	8181	CCCCCCCCCCCCCCCC(=O)OC
tetradecane	90622-46-1	12389	CCCCCCCCCCCCCC
Terpilene	99-86-5	7462	CC1=CC=C(CC1)C(C)C
(R)-p-Menth-1-en-4-ol	20126-76-5	5325830	CC1=CCC(CC1)(C(C)C)O
alpha-Farnesene	502-61-4	5281516	CC(=CCCC(=CCC=C(C)C=C)C)C
.gamma.-Bisabolene	495-62-5	5352437	CC1=CCC(=C(C)CCC=C(C)C)CC1
58870_FLUKA	95910-36-4	15431199	CC1CCC2C(C2(C)C)C3=C1CCC3C
Ethylpalmitate	628-97-7	12366	CCCCCCCCCCCCCCCC(=O)OCC
5-isopropyl-2-methylbicyclo[3.1.0]hex-2-ene	1406-51-5	637518	CC1=CCC2(C1C2)C(C)C
(1R,5R,7S)-4,7-dimethyl-7-(4-methylpent-3-enyl)bicyclo[3.1.1]hept-3-ene	79-92-5	13889654	CC1=CCC2CC1C2(C)CCC=C(C)C
(4S)-4-isopropylcyclohexene-1-carbaldehyde	21391-98-0	11842593	CC(C)C1CCC(=CC1)C=O
(S)-2,2,3-Trimethylcyclopent-3-ene-1-acetaldehyde	23727-15-3	90969	CC1=CCC(C1(C)C)CC=O
o-Acetyl-p-cresol	1450-72-2	15068	CC1=CC(=C(C=C1)O)C(=O)C
WLN: Q1R	1336-27-2	244	C1=CC=C(C=C1)CO
(-)-Globulol	489-41-8	12304985	CC1CCC2C1C3C(C3(C)C)CCC2(C)O
Mandenol	544-35-4	5282184	CCCCCC=CCC=CCCCCCCCC(=O)OCC
METHYL LINOLEATE	112-63-0	5284421	CCCCCC=CCC=CCCCCCCCC(=O)OC
Chrysophanol	481-74-3	10208	CC1=CC(=C2C(=C1)C(=O)C3=C(C2=O)C(=CC=C3)O)O
uracil	66-22-8	1174	C1=CNC(=O)NC1=O
4-Hydroxy-3-methoxystyrene	7786-61-0	332	COC1=C(C=CC(=C1)C=C)O
Adenosine	30143-02-3	60961	C1=NC2=C(C(=N1)N)N=CN2C3C(C(C(O3)CO)O)O
adenine	73-24-5	190	C1=NC2=C(N1)C(=NC=N2)N
METHYL PENTADECANOATE	7132-64-1	23518	CCCCCCCCCCCCCCC(=O)OC
(+)-beta-Phellandrene	555-10-2	442484	CC(C)C1CCC(=C)C=C1
thymol	89-83-8	6989	CC1=CC(=C(C=C1)C(C)C)O
alpha-Cubebene	17699-14-8	86609	CC1CCC(C2C13C2C(=CC3)C)C(C)C
(+)-ALPHA-FUNEBRENE	50894-66-1	6552024	CC1CCC2C13CC=C(C(C3)C2(C)C)C
gem-Dimethylcyclopentane	1638-26-2	15421	CC1(CCCC1)C
3-Butylidene-7-hydroxyphthalide	93236-67-0	5281559	CCCC=C1C2=C(C(=CC=C2)O)C(=O)O1
Senkyunolide K	114569-33-4	Not Available	Not Available
(3Z,6S,7R)-3-butylidene-6-butyryl-7-hydroxy-4,5,6,7-tetrahydroisobenzofuran-1-one	114569-34-5	11265913	CCCC=C1C2=C(C(C(CC2)C(=O)CCC)O)C(=O)O1
Senkyunolide-N	140694-58-2	15138552	Not Available
Levistolid A	88182-33-6	70698035	CCCC=C1C2=C(C3C(CC2)C4CCC35C(=C4)C(=O)OC5=CCCC)C(=O)O1
Senkyunolide-P	142864-23-1	91731751	CCCCC1C23CCC(C=C2C(=O)O1)C4C3C5=C(CC4)C(=CCCC)OC5=O
Senkyunolide-Q	142235-81-2	Not Available	Not Available
Senkyunolide-R	172549-37-0	Not Available	Not Available
1,1-Diethoxybutane	3658-95-5	77225	CCCC(OCC)OCC
Valerophenone	1009-14-9	66093	CCCCC(=O)C1=CC=CC=C1
(1S,5S)-7,7-dimethyl-2-methylenebicyclo[3.1.1]hept-3-ene	4080-46-0	21631119	CC1(C2CC1C(=C)C=C2)C
Z-6,8',7,3'-diligustilide	Not Available	Not Available	Not Available
Allocymene	673-84-7	5368821	CC=C(C)C=CC=C(C)C
alpha-Selinene	473-13-2	10856614	CC1=CCCC2(C1CC(CC2)C(=C)C)C
augustic-acid	26707-60-8	15560128	CC1(CCC2(CCC3(C(=CCC4C3(CCC5C4(CC(C(C5(C)C)O)O)C)C)C2C1)C)C(=O)O)C
m-Ethyltoluene	620-14-4	12100	CCC1=CC=CC(=C1)C
(1R,4S,5R)-4-isopropenyl-1,8-dimethylspiro[4.5]dec-8-ene	28400-13-7	20055537	CC1CCC(C12CCC(=CC2)C)C(=C)C
β-sesquiphellandrene	20307-83-9	12315492	CC(CCC=C(C)C)C1CCC(=C)C=C1
(4aS,7S,8aR)-7-isopropenyl-4a-methyl-1-methylenedecalin	18423-23-9	28237	CC(=C)C1CCC2(CCCC(=C)C2C1)C
Artemisia triene	29548-02-5	5320377	CC(=C)C=CC(C)(C)C=C
betea-CUBEBENE	13744-15-5	93081	CC1CCC(C2C13C2C(=C)CC3)C(C)C
Bicyclogermacrene	24703-35-3	11820258	CC1=CCCC(=CC2C(C2(C)C)CC1)C
Chuanxiongol	87421-30-5	5315862	CCCC=C1C2=C(C=CC=C2O)C(=O)CO1
beta-asarone	5273-86-9	5281758	CC=CC1=CC(=C(C=C1OC)OC)OC
cis-Piperitol	16721-38-3	85567	CC1=CC(C(CC1)C(C)C)O
(1S,4R,5R)-1-isopropyl-4-methyl-4-bicyclo[3.1.0]hexanol	546-79-2	6326181	CC(C)C12CCC(C1C2)(C)O
Cnidilide	3674-03-1	160710	CCCCC1C2CCC=CC2C(=O)O1
1,3,8-p-Menthatriene	18368-95-1	176983	CC1=CC=C(CC1)C(=C)C
CYCLODODECENE	1501-82-2	637538	C1CCCCCC=CCCCC1
cyclohexane,1,1,2,3-tetramethyl-	6783-92-2	57532263	CC1CCCC(C1C)(C)C
2,9-Dimethyldecane	1002-17-1	517733	CC(C)CCCCCCC(C)C
(2R,4aR)-2-isopropenyl-4a,8-dimethyl-2,3,4,5,6,7-hexahydro-1H-naphthalene	17627-30-4	10899741	CC1=C2CC(CCC2(CCC1)C)C(=C)C
1,5,5-trimethyl-6-methylenecyclohexene	514-95-4	578237	CC1=CCCC(C1=C)(C)C
Isobutyrophenone	611-70-1	69144	CC(C)C(=O)C1=CC=CC=C1
Myricanone	32492-74-3	161748	COC1=C(C(=C2CCCCC(=O)CCC3=CC(=C(C=C3)O)C1=C2)O)OC
OCT	31372-91-5	356	CCCCCCCC
p-Cymen-8-ol	1197-01-9	14529	CC1=CC=C(C=C1)C(C)(C)O
2-PHENYLACETOHYDRAZIDE	114-83-0	8247	CC(=O)NNC1=CC=CC=C1
Perlolyrine	29700-20-7	160179	C1=CC=C2C(=C1)C3=C(N2)C(=NC=C3)C4=CC=C(O4)CO
pregnenolone	145-13-1	8955	CC(=O)C1CCC2C1(CCC3C2CC=C4C3(CCC(C4)O)C)C
sedanoic-acid	6697-07-0	Not Available	Not Available
senkyunolide-E	91652-78-7	Not Available	Not Available
senkyunolide-F	94530-84-4	Not Available	Not Available
senkyunolide-J	94530-86-6	24121290	CCCCC1C2=C(C(C(CC2)O)O)C(=O)O1
senkyunolide-L	114586-51-5	Not Available	Not Available
1-Acetyl-beta-carboline	50892-83-6	638667	CC(=O)C1=NC=CC2=C1NC3=CC=CC=C23
senkyunone	142182-61-4	91726743	CC1=CC(=O)C=C(C1=O)CC=C(C)CCC=C(C)CCC=C(C)C
sinapic acid	530-59-6	637775	COC1=CC(=CC(=C1O)OC)C=CC(=O)O
trans-2-Nonen-1-ol	22104-79-6	5364941	CCCCCCC=CCO
Trimethylamine	75-50-3	1146	CN(C)C
wallichilide	93236-64-7	12310596	CC1C(C(CC(O1)OC2CCC3(C(C2)CCC4C3CCC5(C4(CCC5C6=CC(=O)OC6)O)C)C)OC)O
1-terpineol	586-82-3	12443330	CC(C)C1=CCC(CC1)(C)O
2-Propionylfuran	3194-15-8	76662	CCC(=O)C1=CC=CO1
propiophenone	93-55-0	7148	CCC(=O)C1=CC=CC=C1
2,2,3-Trimethylcyclopent-3-ene-1-carboxaldehyde	33843-21-9	15764610	CC1=CCC(C1(C)C)C=O
methyl 2-pentanoylbenzoate	Not Available	11085323	CCCCC(=O)C1=CC=CC=C1C(=O)OC
ISOHEPTANE	591-76-4	11582	CCCCC(C)C
Methyl 2-furoate	611-13-2	11902	COC(=O)C1=CC=CO1
2-Methyl-1-phenylpropene	768-49-0	13030	CC(=CC1=CC=CC=C1)C
(4S,6S)-cis-Carveol	99-48-9	443177	CC1=CCC(CC1O)C(=C)C
2-Methylbenzoxazol	95-21-6	7225	CC1=NC2=CC=CC=C2O1
(5S,6R)-5,6-dimethyltetrahydropyran-2-one	24405-16-1	11029861	CC1CCC(=O)OC1C
3(S)-3-Butyl-4,5-dihydrophthalide	Not Available	14091860	Not Available
3-cyclohexen-1-ol	822-66-2	12532693	C1CC(CC=C1)O
Methyl 3-furoate	1334-76-5	14918	COC(=O)C1=COC=C1
trans-Piperitol	16721-39-4	85568	CC1=CC(C(CC1)C(C)C)O
4-iodoindoline	939759-03-2	16244444	C1CNC2=C1C(=CC=C2)I
4-Octanone	589-63-9	11516	CCCCC(=O)CCC
5-Propyl-2-thiouracil	2954-52-1	3002043	CCCC1=CNC(=S)NC1=O
(6R)-6-butylcyclohepta-1,4-diene	33156-91-1	11804943	CCCCC1CC=CCC=C1
7-oxabicyclo-2.2.1-heptane,1-methyl-4-[1-methylethyl]-	470-67-7	10106	CC(C)C12CCC(O1)(CC2)C
Aromadendrene oxide 2	85710-39-0	16211192	CC1CCC2C1C3C(C3(C)C)CCC24CO4
Amylbenzene	27458-20-4	10864	CCCCCC1=CC=CC=C1
Dimethyl D-malate	70681-41-3	11062697	COC(=O)CC(C(=O)OC)O
3-Butyl-phthalide	6066-49-5	9990075	CCCCC1C2=CC=CC=C2C(=O)O1
Cedrene	469-61-4	Not Available	CC1CCC2C13CC=C(C(C3)C2(C)C)C
carotol	465-28-1	Not Available	CC1=CCC2(CCC(C2(CC1)O)C(C)C)C
Coniferylfcrulate	63644-62-2	Not Available	COC1=C(C=CC(=C1)C=CCOC(=O)C=CC2=CC(=C(C=C2)O)OC)O
Cerulignol	2785-87-7	17739	CCCC1=CC(=C(C=C1)O)OC
Decahydro-1,6-bis(methylene)-4-(1-methylethyl)-naphthalene	54932-90-0	Not Available	Not Available
Hexaphenone	942-92-7	70337	CCCCCC(=O)C1=CC=CC=C1
(E,E)-1,3,5-Undecatriene	19883-29-5	5367412	CCCCCC=CC=CC=C
Heptan	142-82-5	8900	CCCCCCC
L-valyl-L-valinc-achydride	350702-73-7	Not Available	Not Available
cis-ligustilide	4431-01-0	5877292	CCCC=C1C2=C(C=CCC2)C(=O)O1
tetramethylpyrazine	87396-75-6	14296	CC1=C(N=C(C(=N1)C)C)C
METHYL OLEATE	112-62-9	5364509	CCCCCCCCC=CCCCCCCCC(=O)OC
LINOLEYL ALCOHOL	506-43-4	5365682	CCCCCC=CCC=CCCCCCCCCO
Octatriacontane	7194-85-6	23599	CCCCCCCCCCCCCCCCCCCCCCCCCCCCCCCCCCCCCC
(2-amylphenyl)methanol	Not Available	10058085	CCCCCC1=CC=CC=C1CO
Senkyunolide A	63038-10-8	3085257	CCCCC1C2=C(C=CCC2)C(=O)O1
Senkyunolide G	94530-85-5	5321250	CCCCC1(C2=C(C=CCC2)C(=O)O1)O
Germacrene D	23986-74-5	5317570	CC1=CCCC(=C)C=CC(CC1)C(C)C
3-Butylidene-phalide	551-08-6	5352899	CCCC=C1C2=CC=CC=C2C(=O)O1
Choline	62-49-7	305	C[N+](C)(C)CCO
3,4-Dihydroxybenzoic acid	99-50-3	72	C1=CC(=C(C=C1C(=O)O)O)O
Ethyl heptadecanoate	14010-23-2	26397	CCCCCCCCCCCCCCCCC(=O)OCC
Ethyloctadecanoate	111-61-5	8122	CCCCCCCCCCCCCCCCCC(=O)OCC
Ethylpentadecanoate	41114-00-5	Not Available	Not Available
Ferulic acid	537-98-4	445858	COC1=C(C=CC(=C1)C=CC(=O)O)O
Folic acid	59-30-3	6037	C1=CC(=CC=C1C(=O)NC(CCC(=O)O)C(=O)O)NCC2=CN=C3C(=N2)C(=O)N=C(N3)N
Methyl linoleate	112-63-0	5284421	CCCCCC=CCC=CCCCCCCCC(=O)OC
Methyl phenylacetate	101-41-7	7559	COC(=O)CC1=CC=CC=C1
Neocnidilide	4567-33-3	3083857	CCCCC1C2CCCC=C2C(=O)O1
Retinol	68-26-8	445354	CC1=C(C(CCC1)(C)C)C=CC(=CC=CC(=CCO)C)C
Senkyunolide H	94596-27-7	5321251	CCCC=C1C2=C(C(C(CC2)O)O)C(=O)O1
